# Supplementary material
Source: PubMed Central journal article supplement (PMC2648389)

## **The Serine Protease Matriptase 2 Inhibits Hepcidin Activation by Cleaving Membrane Hemojuvelin**

**Laura Silvestri, Alessia Pagani, Antonella Nai, Ivana De Domenico, Jerry Kaplan, and Clara Camaschella**

### **Supplemental Experimental Procedures**

#### **Immunofluorescence analysis**

HeLa cells were grown for 16 hrs before transfection on glass cover slips in 12-well plates. Transfections were carried out using 1 µg (microgram) of plasmid DNA and 3 µl of the liposomal transfection reagent Lipofectamine in 1 ml of OptiMem, according to the manufacturer's instructions. After 12 hrs, the medium was replaced and, 24 hrs later, cells were washed with PBS and fixed in 4% paraformaldehyde/PBS for 30 min at room temperature, followed by three PBS washes. Cells were permeabilized by incubation in PBS containing 0.2% Triton X-100 and 10% donkey serum for 1 hr. The cells were then incubated for 2 hrs at room temperature with rabbit polyclonal anti-FLAG (1:250 dilution; Santa Cruz). After PBS washing, primary antibodies were visualized using the donkey anti-rabbit conjugated with Alexa Fluor 594 (Molecular Probes, Eugene, OR). Cover slips were mounted on glass slides using Dako Mounting Medium (Dako, Carpinteria, CA) and visualized at a 63X magnification under confocal microscope BioRad Leica TCS SP2 AOBS (Leica Microsystems, Bannockburn, IL).

#### **Cloning strategies**

Mutagenesis on matriptase-2 wild type was performed using the following oligonucleotides:

R774C sense: 5' GGCCTCAGTGGCTGGTTCCTGGC 3'

R774C antisense: 5' GCCAGGAACCAGCAGCCACTGAGTGCC 3'

The matriptase-2<sup>MASK</sup> variant, lacking the serine protease domain (Du et al, 2008), was obtained by amplification from the wild type cDNA by using the following primers:

MASK-sense: 5' GGAATTCTGAGCTGTCTCGGC 3' (EcoRI tail)

MASK-antisense:

5'GCTCTAGATCACTTGTTCATCGTCGTCCTTGTTAGTCAAGCTTGCCACAGTC  
ACAGTGC 3' (FLAG, XbaI tail).

The amplicon was cloned into the EcoRI and XbaI sites of pcDNA3.1(+).

Expressing vector encoding uromodulin cDNA (UMOD, cMYC tagged) was a gift of Dr. Luca Rampoldi (Dulbecco Telethon Institute, Molecular Genetics of Renal Disorders, San Raffaele Scientific Institute, Milan, Italy).

### **Incubation of s-HJV with matriptase-2-expressing cells**

HeLa cells were transiently transfected for 18 hrs with HJV<sup>wt</sup> expressing vector as described above, and then incubated in serum-free media. After 24 hrs, media were collected, centrifugated for 10 min at 800 g to eliminate detached cells and filtered at 0.22 µm.

Matriptase-2<sup>wt</sup> (MT2<sup>wt</sup>) or mock- transfected cells were then incubated with the HJV-derived culture media. After 24 hrs, media were collected, concentrated using 5 kDa molecular weight (MW) cutoff ultrafiltration (Amicon Ultra; Millipore, Billerica, MA), and analyzed by SDS-PAGE.

### **Incubation of s-matriptase-2 with HJV-expressing cells**

HeLa cells were transiently transfected for 18 hrs with matriptase-2<sup>wt</sup> (MT2<sup>wt</sup>) or empty vectors, and then incubated in serum-free media. After 24 hrs, media were collected, centrifugated for 10 min at 800 g to eliminate detached cells and filtered at 0.22  $\mu\text{m}$ .

HJV<sup>wt</sup> transfected cells were then incubated with the MT2- or mock-derived culture media. After 24 hrs, media were collected and concentrated using 5 kDa molecular weight (MW) cutoff ultrafiltration (Amicon Ultra; Millipore, Billerica, MA). Cells were incubated with PI-PLC as described above for m-HJV analysis, and then lyzed. Whole cellular extracts, PI-PLC-derived samples and media were then analyzed by SDS-PAGE.

### **Legend to Figures**

**Figure S1.** Immunofluorescence analysis of wild type and mutants matriptase-2. HeLa cells were transiently transfected and analysed for immunofluorescence. Matriptase-2 (MT2) was revealed by anti-FLAG antibody. UP: unpermeabilized cells; P: Triton X-100 permeabilized cells. The white Bar represents 10  $\mu\text{m}$ .

**Figure S2.** HeLa cells were cotransfected with the GPI-anchored protein uromodulin cDNA and matriptase-2 expressing plasmid, or the empty vector. Whole cellular extracts, concentrated media and PI-PLC-derived supernatants were analyzed by Western blot. Anti-cMYC was used to detect uromodulin. s-UMOD indicates soluble and m-UMOD membrane-associated uromodulin. The equal loading was verified by  $\alpha$ -tubulin.

Figure S1

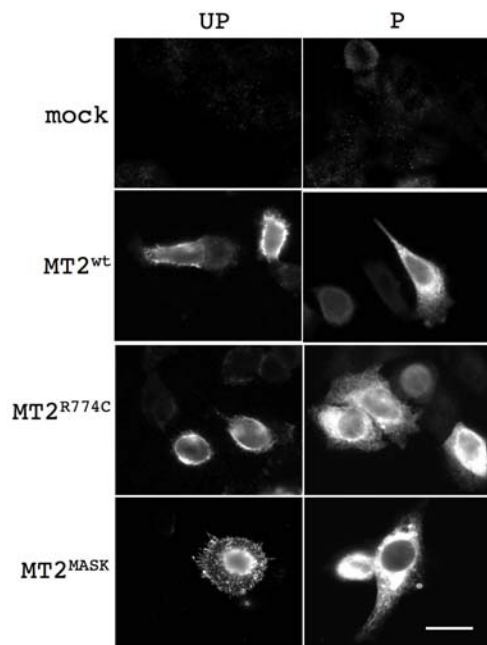

Figure S2

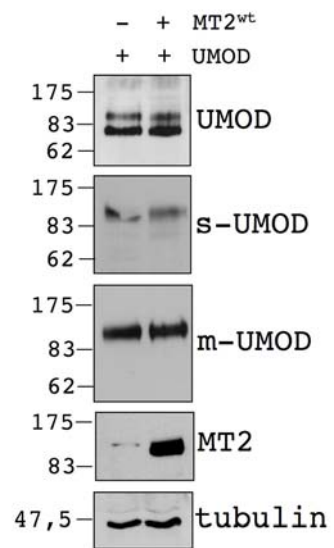

Supplement: NIHMS82933-supplement-01.pdf [file NIHMS82933-supplement-01.pdf]
